# Supplementary figures and images for: Fe70−xNd7B21Zr2Nbx (x = 0–3.0) Permanent Magnets Produced by Crystallizing Amorphous Precursors
Source: MDPI journal article supplement (doi:10.3390/ma17061429), 2024-03-20

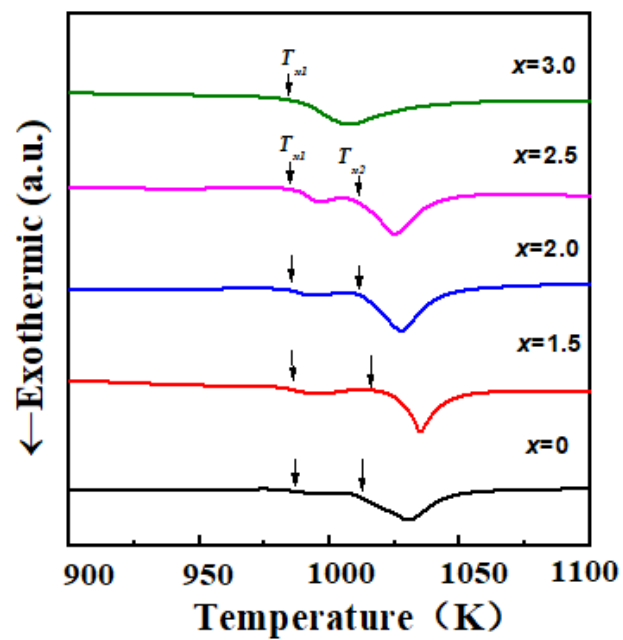

Figure S1. DSC traces for as-cast Fe<sub>70-x</sub>Nd<sub>7</sub>B<sub>21</sub>Zr<sub>2</sub>Nb<sub>x</sub> ( $x=0-3.0$ ) alloys.

Supplement: s1 [file s1]
